# Supplementary material for: The virtual brain: 30 years of video-game play and cognitive abilities
Source: PubMed Central journal article supplement (PMC3772618; doi:10.3389/fpsyg.2013.00629), 2013-09-13
Supplement: SupplementaryTable1.pdf [file SupplementaryTable1.pdf]

Supplementary Table 1. Results summary of studies reviewed in the current paper. Studies are organized alphabetically by section they first appear in the paper.

| <b>Authors</b>                                    | <b>N</b>        | <b>VGP Expertise<br/>VGP Training</b>                                   | <b>Tasks</b>                       | <b>Results</b>                                                                                                         | <b>Correlations</b>                                       |
|---------------------------------------------------|-----------------|-------------------------------------------------------------------------|------------------------------------|------------------------------------------------------------------------------------------------------------------------|-----------------------------------------------------------|
| <b>1. Hand-Eye Coordination and Reaction Time</b> |                 |                                                                         |                                    |                                                                                                                        |                                                           |
| Griffith et al.<br>(1983)                         | 31 VGP, 31 NVGP | VGP Expertise:<br>32.97 (27.14) months exp<br>5.74 (10.24) hours per wk | Rotary Pursuit                     | VGP > NVGP                                                                                                             | None                                                      |
| Orosy-Fildes & Allan<br>(1989)                    | 20 NVGP         | VGP training:<br>15 minutes                                             | Reaction Time                      | Post. Train > Pre. Train                                                                                               | N/A                                                       |
| Yuji<br>(1996)                                    | 17 VGP, 17 NVGP | VGP Expertise:<br>Enthusiasm towards<br>video-games                     | Colour and Shape<br>Discrimination | VGP > NVGP                                                                                                             | N/A                                                       |
| <b>2. Spatial Visualization</b>                   |                 |                                                                         |                                    |                                                                                                                        |                                                           |
| De Lisi & Cammarano<br>(1996)                     | 110 NVGP        | VGP training:<br>2, 30 minute sessions over<br>2 weeks                  | Mental Rotation                    | VGP training effect:<br>Post. Train > Pre. Train<br>Female control VGP<br>training effect:<br>Post. Train > Pre. Train | In-game<br>performance/Mental<br>rotation performance (+) |
| De Lisi & Wolford<br>(2002)                       | 47 NVGP         | VGP training:<br>11, 30 minute sessions<br>over 1 month                 | Mental Rotation                    | VGP training effect:<br>Post. Train > Pre. Train                                                                       | N/A                                                       |
| Dorval & Pepin<br>(1986)                          | 70 NVGP         | VGP training:<br>40 game plays                                          | Spatial Relations                  | VGP training effect:<br>Post. Train > Pre. Train                                                                       | N/A                                                       |

|                            |                                       |                                                                                                   |                                                                                         |                                                                                     |                                                                                               |
|----------------------------|---------------------------------------|---------------------------------------------------------------------------------------------------|-----------------------------------------------------------------------------------------|-------------------------------------------------------------------------------------|-----------------------------------------------------------------------------------------------|
| Gagnon (1985)              | 58 NVGP                               | VGP training:<br>5 hours                                                                          | Spatial Orientation<br>Spatial Visualization<br>Visual Pursuit<br>Hand-eye coordination | VGP training effect: Post. Train > Pre. Train for female spatial visualization only | Prior VGP experience/Visual Pursuit (+), Spatial Visualization (+), Hand-eye coordination (-) |
| McClurg & Chaillè (1987)   | 57 VNGP                               | VGP training:<br>45 minutes, twice a week for 6 weeks                                             | Mental Rotation                                                                         | Post. Train > Pre. Train                                                            | N/A                                                                                           |
| Okagaki & Frensch (1994)   | Exp. 1: 57 NVGP<br>Exp. 2: 53 NVGP    | VGP training:<br>12, 30 minute sessions                                                           | Mental Rotation<br>Spatial Visualization                                                | VGP training effect:<br>Post. Train > Pre. Train                                    | N/A                                                                                           |
| Sims & Mayer (2002)        | Exp. 1: 53 VGP, 45 NVGP<br>Exp. 2: 24 | VGP expertise:<br>>60 lines on Tetris<br>Video-game training:<br>12, 1 hour sessions over 4 weeks | Mental Rotation                                                                         | VGP > NVGP only for stimuli similar to in-game items                                | None                                                                                          |
| Subrahmanyam et al. (1994) | 61 NVGP                               | VGP training:<br>3, 45 minute sessions, maximum 1 week apart                                      | Computerized Spatial Skills Battery                                                     | VGP training effect:<br>Post. Train > Pre. Train                                    | N/A                                                                                           |

### 3. Visuospatial Attention

|                    |                                            |                                                                                                               |                                                                                                                                                                                                                                                    |                                                                                                                                                                                            |     |
|--------------------|--------------------------------------------|---------------------------------------------------------------------------------------------------------------|----------------------------------------------------------------------------------------------------------------------------------------------------------------------------------------------------------------------------------------------------|--------------------------------------------------------------------------------------------------------------------------------------------------------------------------------------------|-----|
| Boot et al. (2008) | Exp. 1: 11 VGP, 10 NVGP<br>Exp. 2: 82 NVGP | VGP expertise:<br>7 hours per week over past 2 years<br>VGP training:<br>15, 1.5 hour sessions over 4-5 weeks | Attentional Blink<br>Corsi Block-Tapping<br>Enumeration<br>Functional Field of View<br>Multiple Object-Tracking<br>Mental Rotation<br>O-Span<br>Ravens Matrices<br>Spatial 2-Back<br>Task Switching<br>Tower of London<br>Visual Shrt. Term Memory | VGP > NVGP for multiple object tracking, mental rotation, task switching and visual shrt. term memory only<br>Control VGP training effect:<br>Post. Train > Pre. Train for mental rotation | N/A |
|--------------------|--------------------------------------------|---------------------------------------------------------------------------------------------------------------|----------------------------------------------------------------------------------------------------------------------------------------------------------------------------------------------------------------------------------------------------|--------------------------------------------------------------------------------------------------------------------------------------------------------------------------------------------|-----|

|                          |                                                                                                                       |                                                                                                                                                                |                                                                                   |                                                                                               |                                               |
|--------------------------|-----------------------------------------------------------------------------------------------------------------------|----------------------------------------------------------------------------------------------------------------------------------------------------------------|-----------------------------------------------------------------------------------|-----------------------------------------------------------------------------------------------|-----------------------------------------------|
| Dye & Bavelier (2010)    | Exp. 1: 58 VGP, 103 NVGP<br>Exp. 2: 55 VGP, 99 NVGP<br>Exp. 3: 56 VGP, 95 NVGP                                        | VGP expertise:<br>Self-report playing 'first' or 'third' person 'shooters'                                                                                     | Useful Field of View<br>Attentional Blink<br>Multiple Object Tracking             | VGP > NVGP, young VGPs display capabilities exceeding or expected of older NVGPs              | N/A                                           |
| Dye et al. (2009)        | 56 VGP, 75 NVGP                                                                                                       | VGP expertise: Self-report playing of any action video-game over the past 6 months                                                                             | Attentional Network Task                                                          | VGP > NVGP across all age ranges                                                              | N/A                                           |
| Green & Bavelier (2003)  | Exp. 1: 8 VGP, 8 NVGP<br>Exp. 2: 13 VGP, 13 NVGP<br>Exp. 3: 8 VGP, 8 NVGP<br>Exp. 4: 8 VGP, 8 NVGP<br>Exp. 5: 17 NVGP | VGP expertise:<br>4, 1 hour sessions per day over past 6 months<br>VGP training:<br>1 hour per day over 10 days                                                | Flanker Compatibility<br>Enumeration<br>Useful Field of View<br>Attentional Blink | VGP > NVGP<br>Action VGP training effect:<br>Post. Train > Pre. Train                         | VGP improvement/task improvement (marginal +) |
| Green & Bavelier (2006a) | Exp. 1: 8 VGP, 8 NVGP<br>Exp. 2: 8 VGP, 8 NVGP<br>Exp. 3: 32 NVGP                                                     | VGP expertise:<br>3-4 days per week over past 6 months<br>VGP training:<br>5 hours per week over 6 weeks                                                       | Flanker Compatibility<br>Useful Field of View                                     | VGP > NVGP<br>Action VGP training effect:<br>Post. Train > Pre. Train on useful field of view | None                                          |
| Green & Bavelier (2006b) | Exp. 1: 13 VGP, 13 NVGP<br>Exp. 2: 17 NVGP<br>Exp. 3: 11 VGP, 11 NVGP<br>Exp. 4: 20 NVGP<br>Exp. 5: 32 NVGP           | VGP expertise:<br>3-4 days a week over past 6 months, 5 hours per week over the past 6 months<br>VGP training:<br>10 hours over 15 days, 30 hours over 6 weeks | Enumeration<br>Multiple Object Tracking                                           | VGP > NVGP<br>Action VGP training effect:<br>Post. Train > Pre. Train                         | N/A                                           |
| Greenfield et al. (1994) | Exp. 1: 8 VGP, 8 NVGP<br>Exp. 2: 40 NVGP                                                                              | VGP expertise:<br>>200 000 points on Robot Battle                                                                                                              | Divided Attention                                                                 | VGP > NVGP<br>VGP training effect:<br>Post. Train > Pre. Train                                | N/A                                           |

|                              |                 |                                                                       |                                                                    |            |     |
|------------------------------|-----------------|-----------------------------------------------------------------------|--------------------------------------------------------------------|------------|-----|
|                              |                 | Video-game training:<br>5 hours                                       |                                                                    |            |     |
| Sungur & Boduroglu<br>(2012) | 24 VGP, 20 NVGP | VGP expertise:<br>3-4, 1 hour sessions per<br>week over past 6 months | Multiple Identity Tracking<br>Colour Wheel<br>Useful Field of View | VGP > NVGP | N/A |

#### 4. Visual Anticipation and Visual Search Strategies

|                                   |                                                          |                                                                     |                                       |                                                                                 |                                                                                      |
|-----------------------------------|----------------------------------------------------------|---------------------------------------------------------------------|---------------------------------------|---------------------------------------------------------------------------------|--------------------------------------------------------------------------------------|
| Bialystok<br>(2006)               | 40 VGP, 57 NVGP                                          | VGP expertise:<br>Self-report                                       | Simon                                 | VGP > NVGP, simple<br>reaction time benefit                                     | N/A                                                                                  |
| Castel et al.<br>(2005)           | Exp. 1: 20 VGP, 20<br>NVGP<br>Exp. 2: 10 VGP, 10<br>NVGP | VGP expertise:<br>4, 1 hour sessions per<br>week over past 6 months | Inhibition of Return<br>Visual Search | VGP > NVGP, simple<br>reaction time benefit                                     | N/A                                                                                  |
| Clark et al.<br>(2011)            | 15 VGP, 20 NVGP                                          | VGP expertise:<br>6 hours per week over<br>past 6 months            | Change Detection                      | VGP > NVGP                                                                      | N/A                                                                                  |
| Hubert-Wallander et al.<br>(2011) | Exp. 1: 10 VGP, 11<br>NVGP<br>Exp. 2: 19 VGP, 15<br>NVGP | VGP expertise:<br>5 hours per week over<br>past year                | Visual Search<br>Exogenous Cuing      | VGP search rate and<br>reaction time > NVGP<br>search rate and reaction<br>time | N/A                                                                                  |
| Kuhlman & Beitel<br>(1991)        | 105                                                      | N/A                                                                 | Basin Timer                           | N/A                                                                             | VGP experience/Accuracy<br>(+), consistency of<br>anticipation of<br>coincidence (+) |

#### 5. Temporal Dynamics of Sensory Attention

|                          |                                              |                                                          |                                                       |                                                                                                         |                                                           |
|--------------------------|----------------------------------------------|----------------------------------------------------------|-------------------------------------------------------|---------------------------------------------------------------------------------------------------------|-----------------------------------------------------------|
| Donohue et al.<br>(2010) | 18 VGP, 18 NVGP<br>(9 in-between categories) | VGP expertise:<br>2 hours per week over<br>past 6 months | Simultaneity Judgement<br>Temporal Order<br>Judgement | VGP point of subjective<br>simultaneity accuracy ><br>NVGP point of subjective<br>simultaneity accuracy | VGP<br>experience/Subjective<br>simultaneity accuracy (+) |
|--------------------------|----------------------------------------------|----------------------------------------------------------|-------------------------------------------------------|---------------------------------------------------------------------------------------------------------|-----------------------------------------------------------|

|                       |                                                                     |                                                                                                |                                                 |                                                                                                                                                                                                    |     |
|-----------------------|---------------------------------------------------------------------|------------------------------------------------------------------------------------------------|-------------------------------------------------|----------------------------------------------------------------------------------------------------------------------------------------------------------------------------------------------------|-----|
| Li et al.<br>(2010)   | Exp. 1: 9 VGP, 10 NVGP<br>Exp. 2: 9 VGP, 11 NVGP<br>Exp. 3: 25 NVGP | VGP expertise:<br>5 hours per week over<br>past year<br>VGP training:<br>50 hours over 9 weeks | Backwards Masking                               | VGP backwards masking<br>effect < NVGP backwards<br>masking effect<br>Action VGP training<br>effect:<br>Post. Train backwards<br>masking effect < Pre.<br>Train backwards masking<br>effect        | N/A |
| West et al.<br>(2008) | Exp. 1: 12 VGP, 12<br>NVGP<br>Exp. 2: 12 VGP, 12<br>NVGP            | VGP expertise:<br>3-4, 2 hour sessions per<br>week over the past six<br>months                 | Temporal Order<br>Judgement<br>Signal Detection | VGP point of subjective<br>simultaneity accuracy <<br>NVGP point of subjective<br>simultaneity accuracy,<br>VGP sensitivity > NVGP<br>sensitivity (all except<br>easiest and hardest<br>condition) | N/A |

## 6. Exogenous and Endogenous Attention

|                           |                 |                                                          |                     |                                                 |     |
|---------------------------|-----------------|----------------------------------------------------------|---------------------|-------------------------------------------------|-----|
| Chisholm et al.<br>(2010) | 15 VGP, 15 NVGP | VGP expertise:<br>3 hours per week over<br>past 6 months | Attentional Capture | VGP > NVGP, VGP less<br>affected by distractors | N/A |
|---------------------------|-----------------|----------------------------------------------------------|---------------------|-------------------------------------------------|-----|

## 7. Task Switching

|                             |                                                          |                                                                     |                                       |                                                          |     |
|-----------------------------|----------------------------------------------------------|---------------------------------------------------------------------|---------------------------------------|----------------------------------------------------------|-----|
| Colzato et al.<br>(2010)    | 17 VGP, 17 NVGP                                          | VGP expertise:<br>4 sessions per week over<br>past 6 months         | Task Switching                        | VGP > NVGP                                               | N/A |
| Karle et al.<br>(2010)      | Exp. 1: 30 VGP, 26<br>NVGP<br>Exp. 2: 20 VGP, 20<br>NVGP | VGP expertise:<br>4, 1 hour sessions per<br>week over past 6 months | Task Switching                        | VGP > NVGP only when<br>proactive interference is<br>low | N/A |
| Nelson & Strachan<br>(2009) | Exp. 1: 20 NVGP<br>Exp. 2: 20 NVGP                       | VGP training:<br>1 hour                                             | Location Detection<br>Figure Matching | Action VGP training<br>effect:                           | N/A |

Post. Train RT > Pre.  
Train RT  
Control VGP training  
effect:  
Post. Train ACC. > Pre.  
Train ACC

## 8. Fundamental Properties of the Visual System and Use of Sensory Evidence

|                            |                                                                                                           |                                                                                                      |                                                                                       |                                                                                                                                                                                                                                                                                                                                     |     |
|----------------------------|-----------------------------------------------------------------------------------------------------------|------------------------------------------------------------------------------------------------------|---------------------------------------------------------------------------------------|-------------------------------------------------------------------------------------------------------------------------------------------------------------------------------------------------------------------------------------------------------------------------------------------------------------------------------------|-----|
| Buckley et al.<br>(2010)   | 10 VGP, 10 NVGP                                                                                           | VGP expertise:<br>1 hour per day, at least 4<br>days per week over past 6<br>months                  | Goldmann Kinetic<br>Perimetry                                                         | VGP (both central and<br>peripheral) visual field ><br>NVGP                                                                                                                                                                                                                                                                         | N/A |
| Green & Bavelier<br>(2007) | Exp. 1: 10 VGP, 10<br>NVGP<br>Exp. 2: 32 NVGP                                                             | VGP expertise:<br>5 hours per week over<br>past 6 months<br>VGP training:<br>30 hours over 6-8 weeks | Visual Crowding                                                                       | VGP > NVGP<br>(including 'T' alone)<br>Action VGP training<br>effect:<br>Post. Train > Pre. Train<br>for crowding only                                                                                                                                                                                                              | N/A |
| Green et al.<br>(2010)     | Exp. 1: 11 VGP, 12<br>NVGP<br>Exp. 2: 11 VGP, 12<br>NVGP<br>Exp. 3: 25 NVGP<br>Exp. 4: 11 VGP, 12<br>NVGP | VGP expertise:<br>5 hours per week over<br>past year<br>VGP training:<br>50 hours over 12 weeks      | Visual Motion Direction<br>Discrimination<br>Auditory Tone Location<br>Discrimination | VGP sensory<br>accumulation rate ><br>NVGP sensory<br>accumulation rate, VGP<br>evidence threshold <<br>NVGP evidence threshold<br>Action VGP training<br>effect:<br>Post. Train sensory<br>accumulation rate > Pre.<br>Train sensory<br>accumulation rate, Post.<br>Train evidence threshold<br>< Pre. Train evidence<br>threshold | N/A |

|                     |                                            |                                                                                                      |                      |                                                                          |     |
|---------------------|--------------------------------------------|------------------------------------------------------------------------------------------------------|----------------------|--------------------------------------------------------------------------|-----|
| Li et al.<br>(2009) | Exp. 1: 21 VGP, 19 NVGP<br>Exp. 2: 35 NVGP | VGP expertise:<br>5 hours per week over<br>past 6 months<br>VGP training:<br>50 hours over 5-9 weeks | Contrast Sensitivity | VGP > NVGP<br>Action VGP training<br>effect:<br>Post. Train > Pre. Train | N/A |
|---------------------|--------------------------------------------|------------------------------------------------------------------------------------------------------|----------------------|--------------------------------------------------------------------------|-----|

## 9. Video-Game Play as a Cognitive Intervention

|                          |         |                                                          |                                                                                                                                                                                     |                                                                                                                                                      |                                                                             |
|--------------------------|---------|----------------------------------------------------------|-------------------------------------------------------------------------------------------------------------------------------------------------------------------------------------|------------------------------------------------------------------------------------------------------------------------------------------------------|-----------------------------------------------------------------------------|
| Basak et al.<br>(2008)   | 40 NVGP | VGP training:<br>15, 1.5 hour sessions over<br>5 weeks   | Attentional Blink<br>Enumeration<br>Functional Field of View<br>Mental Rotation<br>N-Back<br>O-Span<br>Ravens Matrices<br>Stopping<br>Task Switching<br>Visual Shrt. Term<br>Memory | VGP training effect:<br>Post. Train > Pre. Train<br>for mental rotation, N-<br>back, Ravens matrices,<br>task switching, visual<br>short term memory | N/A                                                                         |
| Clark et al.<br>(1987)   | 14 NVGP | VGP training:<br>14 hours over 7 weeks                   | Colour Discrimination                                                                                                                                                               | VGP training effect:<br>Post. Train > Pre. Train                                                                                                     | N/A                                                                         |
| Drew & Waters<br>(1986)  | 15 NVGP | VGP training:<br>1.5 hours, twice a week<br>for 2 months | WAIS<br>Purdue Pegboard<br>Rotary Pursuit                                                                                                                                           | VGP training effect:<br>Post. Train > Pre. Train<br>for all measures                                                                                 | VGP train group/<br>coordination (+), driving<br>(+), accidents at home (-) |
| Dustman et al.<br>(1992) | 60 NVGP | VGP training:<br>1 hour, 3 times a week<br>over 11 weeks | Visual Sensitivity<br>Symbol Digit Modality<br>Trails B<br>Stroop<br>Finger Tapping<br>Visual Retention<br>Mult. Meas. of Memory<br>Profile of Mood States<br>Sternberg             | VGP training effect:<br>Post. Train > Pre. Train<br>for Sternberg only.                                                                              | N/A                                                                         |

|                            |         |                                                |                                             |                                                                                            |     |
|----------------------------|---------|------------------------------------------------|---------------------------------------------|--------------------------------------------------------------------------------------------|-----|
| Goldstein et al.<br>(1997) | 22 NVGP | VGP training:<br>5 hours per week over 5 weeks | Sternberg<br>Stroop<br>Emotional Well-Being | VGP training effect:<br>Post. Train > Pre. Train<br>for Stroop and Emotional<br>Well-Being | N/A |
|----------------------------|---------|------------------------------------------------|---------------------------------------------|--------------------------------------------------------------------------------------------|-----|

## 10. Neuroimaging and Video-Game Play

|                           |                 |                                                                    |                              |                                                                                                                                                                        |                                               |
|---------------------------|-----------------|--------------------------------------------------------------------|------------------------------|------------------------------------------------------------------------------------------------------------------------------------------------------------------------|-----------------------------------------------|
| Bavelier et al.<br>(2012) | 12 VGP, 14 NVGP | VGP expertise:<br>5 hours per week over<br>past year               | Target Detection             | VGP > NVGP<br>NVGP Fronto-Parietal<br>Activation > VGP Fronto-<br>Parietal Activation for<br>high load, VGP Visual<br>Area MT < NVGP Visual<br>Area MT for distractors | N/A                                           |
| Granek et al.<br>(2010)   | 13 VGP, 13 NVGP | VGP expertise:<br>12.8 (8.6) hours per week<br>over past 3 years   | Visuomotor<br>Transformation | VGP show > frontal<br>activation, NVGP ><br>parietal activation                                                                                                        | N/A                                           |
| Haier et al.<br>(1992)    | 24 NVGP         | VGP training:<br>30-45 minutes, 5 times a<br>week for 4 to 8 weeks | Tetris                       | VGP training effect:<br>Whole brain metabolism<br>Post. Train < Pre. Train                                                                                             | VGP improvement/Whole<br>brain metabolism (-) |
| Mishra et al.<br>(2011)   | 21 VGP, 20 NVGP | VGP expertise:<br>9 (2.7) hours per week<br>over past year         | Target Detection             | VGP > NVGP,<br>VGP SSVEP Amplitude <<br>NVGP SSVEP Amplitude<br>for unattended stimuli,<br>VGP P300 Amplitude ><br>NVGP P300 Amplitude<br>for high load                | N/A                                           |

## 11. Challenges to the Video-Game Play Literature

|                       |                                               |                                                                              |                      |                                                                           |     |
|-----------------------|-----------------------------------------------|------------------------------------------------------------------------------|----------------------|---------------------------------------------------------------------------|-----|
| Feng et al.<br>(2007) | Exp. 1: 24 VGP, 24<br>NVGP<br>Exp. 2: 20 NVGP | VGP expertise:<br>4 hours per week<br>VGP training:<br>10 hours over 4 weeks | Useful Field of View | VGP > NVGP<br>Action VGP training<br>effect:<br>Post. Train > Pre. Train, | N/A |
|-----------------------|-----------------------------------------------|------------------------------------------------------------------------------|----------------------|---------------------------------------------------------------------------|-----|



|                               |                                                    |                                                                     |                                                                                              |                                                                                                                                                     |     |
|-------------------------------|----------------------------------------------------|---------------------------------------------------------------------|----------------------------------------------------------------------------------------------|-----------------------------------------------------------------------------------------------------------------------------------------------------|-----|
| Irons et al.<br>(2011)        | Exp. 1: 19 VGP, 13 NVGP<br>Exp. 2: 17 VGP, 15 NVGP | VGP expertise:<br>3-4 days per week over<br>previous 6 months       | Flanker Compatibility<br>Eriksen Flanker                                                     | no loss in gains 5 months<br>after training ceased<br><br>NVGP positive<br>compatibility at high<br>load/VGP negative<br>compatibility at high load | N/A |
| Murphy & Spencer<br>(2009)    | 32 VGP, 29 NVGP                                    | VGP expertise:<br>4, 1 hour sessions per<br>week over past 6 months | Attentional Blink<br>Useful Field of View<br>Inattentional Blindness<br>Repetition Blindness | VGP > NVGP in<br>attentional blink at<br>shortest target interval<br>only                                                                           | N/A |
| Quaiser-Pohl et al.<br>(2006) | 861                                                | N/A                                                                 | Mental Rotation                                                                              | Action VGP in males<br>only, predicts superior<br>mental rotation<br>performance                                                                    | N/A |
| Spence et al.<br>(2009)       | 20 NVGP<br>(10 matched male-female<br>pairs)       | VGP training:<br>10 hours over 4 weeks                              | Attentional Visual Field                                                                     | Post. Train > Pre. Train,<br>no loss in gains 4 months<br>after training ceased                                                                     | N/A |

---
